# Supplementary material for: In silico discovery of substituted pyrido[2,3-d]pyrimidines and pentamidine-like compounds with biological activity in myotonic dystrophy models
Source: PubMed Central journal article supplement (PMC5459475; doi:10.1371/journal.pone.0178931), 2017-06-05
Supplement: pone.0178931.s003.pdf [file pone.0178931.s003.pdf]

## **In silico discovery of substituted pyrido[2,3-*d*]pyrimidines and pentamidine-like compounds with biological activity in myotonic dystrophy models**

Àlex L. González<sup>1‡</sup>, Piotr Konieczny<sup>2,3,4‡</sup>, Beatriz Llamusi<sup>2,3,4</sup>, Estefanía Delgado-Pinar<sup>5</sup>, José I. Borrell<sup>1</sup>, Jordi Teixidó<sup>1</sup>, Enrique García-España<sup>5</sup>, Manuel Pérez-Alonso<sup>2,3,4</sup>, Roger Estrada-Tejedor<sup>1\*</sup>, Rubén Artero<sup>2,3,4</sup>

‡ Equal contributors

<sup>1</sup>Grup d'Enginyeria Molecular (GEM), Institut Químic de Sarrià (IQS) – Universitat Ramon Llull (URL), Barcelona, Catalonia, Spain

<sup>2</sup>Translational Genomics Group, Incliva Health Research Institute, Valencia, Spain

<sup>3</sup>Department of Genetics and Interdisciplinary Research Structure for Biotechnology and Biomedicine (ERI BIOTECMED), University of Valencia, Valencia, Spain

<sup>4</sup>Incliva-CIPF joint unit, Valencia, Spain.

<sup>5</sup>Instituto de Ciencia Molecular, Universidad de Valencia, Paterna, Valencia, Spain.

**S1 Table.** Top 50 molecules obtained from the ZINC database using the EON<sup>2</sup> protocol as described in the Materials and Methods section.

| ZINC ID      | ET_pb | ET_coul | ET_combo | EON_ShapeTanimoto | Rank |
|--------------|-------|---------|----------|-------------------|------|
| ZINC08873523 | 0.775 | 0.74    | 1.569    | 0.794             | 1    |
| ZINC60135435 | 0.701 | 0.643   | 1.562    | 0.861             | 2    |
| ZINC08873186 | 0.754 | 0.705   | 1.535    | 0.781             | 3    |
| ZINC01248815 | 0.672 | 0.627   | 1.524    | 0.852             | 4    |
| ZINC08873550 | 0.738 | 0.681   | 1.52     | 0.782             | 5    |
| ZINC08873397 | 0.705 | 0.676   | 1.511    | 0.806             | 6    |
| ZINC38551188 | 0.68  | 0.674   | 1.506    | 0.826             | 7    |
| ZINC32610238 | 0.661 | 0.7     | 1.505    | 0.845             | 8    |
| ZINC12902935 | 0.662 | 0.698   | 1.505    | 0.843             | 9    |
| ZINC06926130 | 0.632 | 0.623   | 1.503    | 0.872             | 10   |
| ZINC08873084 | 0.723 | 0.668   | 1.502    | 0.78              | 11   |
| ZINC08873462 | 0.72  | 0.686   | 1.496    | 0.776             | 12   |
| ZINC12902559 | 0.666 | 0.701   | 1.494    | 0.828             | 13   |
| ZINC08873463 | 0.719 | 0.681   | 1.492    | 0.773             | 14   |
| ZINC38551234 | 0.684 | 0.641   | 1.49     | 0.806             | 15   |
| ZINC08914133 | 0.731 | 0.711   | 1.489    | 0.758             | 16   |
| ZINC09318666 | 0.692 | 0.645   | 1.488    | 0.796             | 17   |
| ZINC08873391 | 0.707 | 0.672   | 1.488    | 0.781             | 18   |
| ZINC60135037 | 0.642 | 0.569   | 1.487    | 0.845             | 19   |
| ZINC08873383 | 0.707 | 0.674   | 1.487    | 0.78              | 20   |
| ZINC08873405 | 0.689 | 0.652   | 1.486    | 0.797             | 21   |
| ZINC06876442 | 0.681 | 0.677   | 1.484    | 0.803             | 22   |
| ZINC08873379 | 0.706 | 0.671   | 1.482    | 0.776             | 23   |
| ZINC39475841 | 0.644 | 0.62    | 1.482    | 0.837             | 24   |
| ZINC08873077 | 0.692 | 0.633   | 1.48     | 0.788             | 25   |
| ZINC12898913 | 0.684 | 0.719   | 1.479    | 0.795             | 26   |
| ZINC08394670 | 0.681 | 0.669   | 1.477    | 0.796             | 27   |
| ZINC08873460 | 0.703 | 0.662   | 1.476    | 0.773             | 28   |
| ZINC73348308 | 0.717 | 0.638   | 1.475    | 0.758             | 29   |
| ZINC08873122 | 0.74  | 0.701   | 1.473    | 0.732             | 30   |
| ZINC08873215 | 0.731 | 0.704   | 1.47     | 0.739             | 31   |
| ZINC08873444 | 0.69  | 0.642   | 1.465    | 0.775             | 32   |
| ZINC38551244 | 0.652 | 0.623   | 1.463    | 0.811             | 33   |
| ZINC08739102 | 0.675 | 0.637   | 1.462    | 0.787             | 34   |
| ZINC12671768 | 0.619 | 0.633   | 1.46     | 0.841             | 35   |
| ZINC08873112 | 0.705 | 0.676   | 1.459    | 0.754             | 36   |
| ZINC08873363 | 0.68  | 0.633   | 1.459    | 0.778             | 37   |
| ZINC60135528 | 0.678 | 0.597   | 1.457    | 0.78              | 38   |
| ZINC08873109 | 0.703 | 0.675   | 1.457    | 0.754             | 39   |
| ZINC60135285 | 0.636 | 0.578   | 1.456    | 0.82              | 40   |
| ZINC70845249 | 0.668 | 0.592   | 1.456    | 0.788             | 41   |
| ZINC08873110 | 0.704 | 0.674   | 1.454    | 0.75              | 42   |

| <i>Continuation of table S1.</i> |       |       |       |       |    |
|----------------------------------|-------|-------|-------|-------|----|
| ZINC08873439                     | 0.685 | 0.629 | 1.454 | 0.769 | 43 |
| ZINC04575969                     | 0.591 | 0.57  | 1.452 | 0.861 | 44 |
| ZINC08873136                     | 0.694 | 0.642 | 1.451 | 0.757 | 45 |
| ZINC08873449                     | 0.68  | 0.632 | 1.451 | 0.77  | 46 |
| ZINC58004049                     | 0.727 | 0.683 | 1.449 | 0.722 | 47 |
| ZINC03065518                     | 0.71  | 0.637 | 1.449 | 0.739 | 48 |
| ZINC04349887                     | 0.668 | 0.668 | 1.448 | 0.78  | 49 |
| ZINC08873138                     | 0.673 | 0.599 | 1.448 | 0.775 | 50 |

## References

---

- (1) Wetzel, S.; Klein, K.; Renner, S.; Rauh, D.; Oprea, T. I.; Mutzel, P.; Waldmann, H. Interactive Exploration of Chemical Space with Scaffold Hunter. *Nat. Chem. Biol.* **2009**, *5* (8), 581–583.
- (2) Muchmore, S. W.; Souers, A. J.; Akritopoulou-Zanze, I. The Use of Three-Dimensional Shape and Electrostatic Similarity Searching in the Identification of a Melanin-Concentrating Hormone Receptor 1 Antagonist. *Chem. Biol. Drug Des.* **2006**, *67* (2), 174–176.
